# Supplementary material for: An optimized protocol for generation and analysis of Ion Proton sequencing reads for RNA-Seq
Source: PubMed Central journal article supplement (PMC4880854; doi:10.1186/s12864-016-2745-8), 2016-05-26

**A**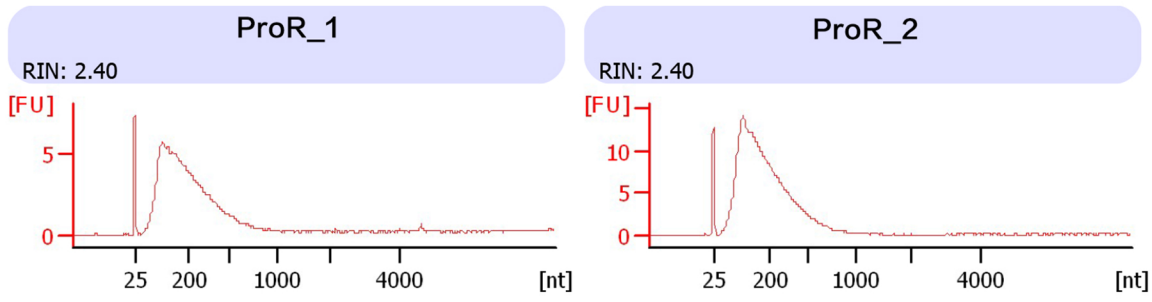**B**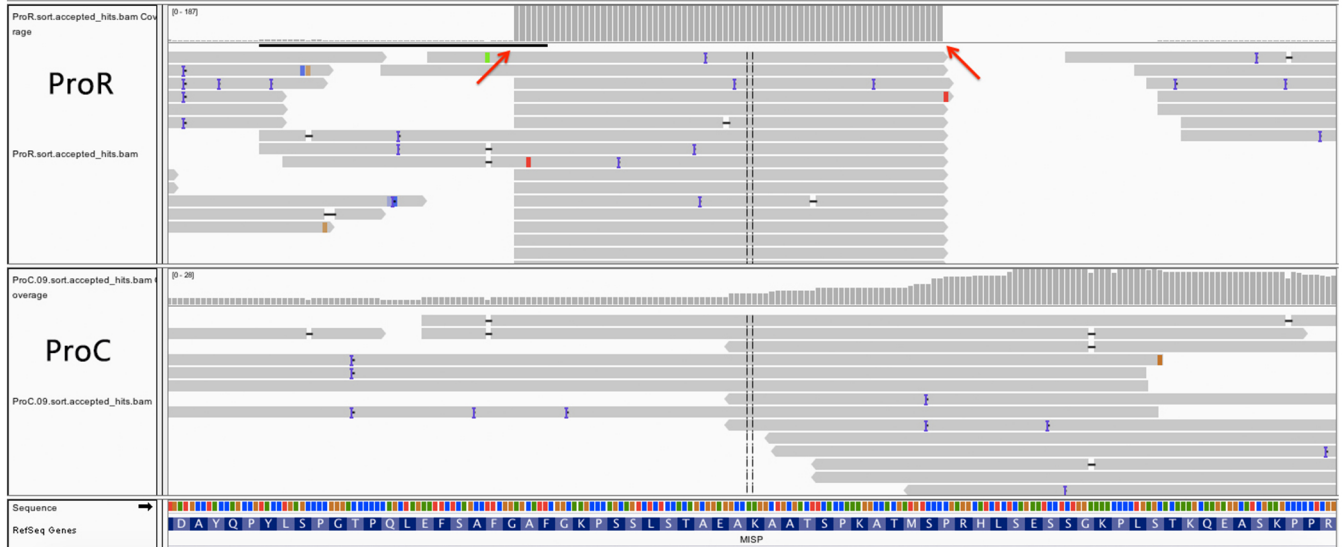**C**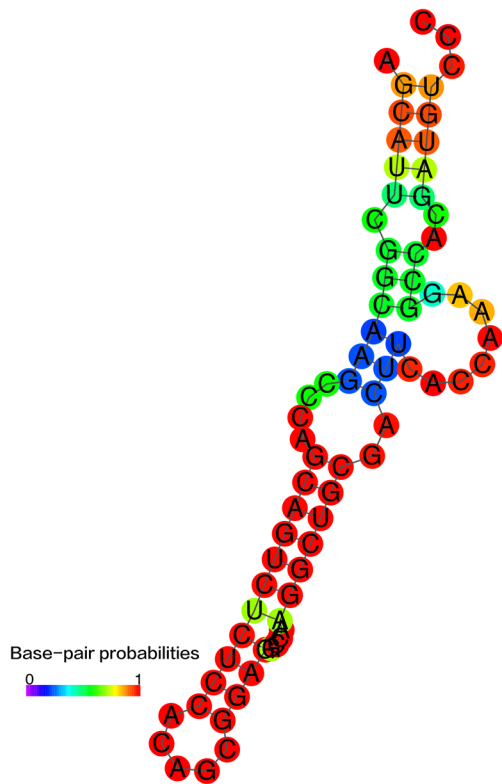**D**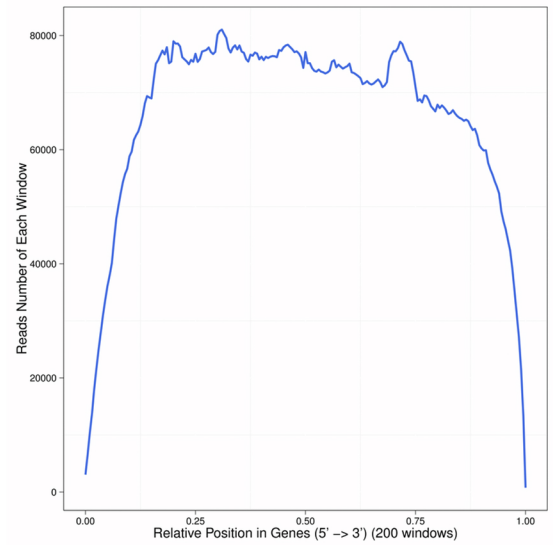**E**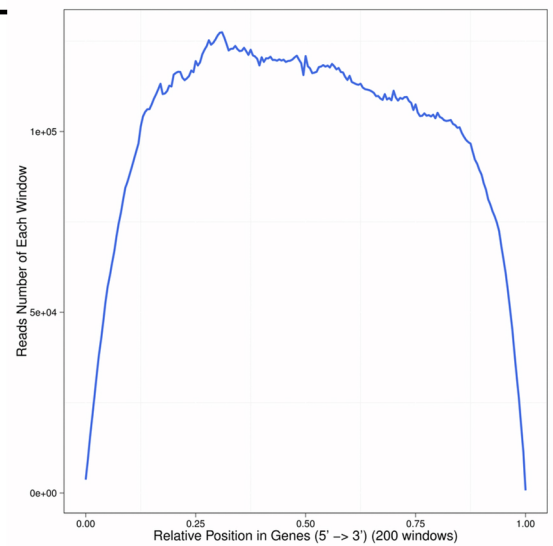

Supplement: 12864_2016_2745_MOESM4_ESM.pdf [file 12864_2016_2745_MOESM4_ESM.pdf]
